# Supplementary material
Source: HighWire-hosted journal article supplement (http://www.qdcxjkg.com/highwire/filestream/113851/field_highwire_adjunct_files/0/ERJ-00872-2012_Disclosures.pdf)
Supplement: ERJ-00872-2012_Disclosures.pdf [file ERJ-00872-2012_Disclosures.pdf]

M. Humbert has relationships with drug companies including Actelion, Aires, Astrazeneca, Bayer, BMS, GSK, Merck, Novartis, Nycomed, Pfizer, Stallergènes, TEVA and United Therapeutics. In addition to being an investigator in trials involving these companies, relationships include consultancy service and membership of scientific advisory boards.

D. Montani has relationships with drug companies including AB Science, Actelion, BayerSchering, GSK, Novartis, Pfizer and United Therapeutics. In addition to being an investigator in trials involving these companies, relationships include consultancy service and membership of scientific advisory boards.

Y. Yeghiazarians received a research grant from Actelion Pharmaceuticals Ltd.
